# Supplementary material
Source: PubMed Central journal article supplement (PMC4610296)
Supplement: JSLHR-58-3-1001-s001.pdf [file JSLHR-58-3-1001-s001.pdf]

**Supplemental Table S1.** Full stimulus set for Task 6, Experiment 2.

|     | <u>Target</u> | <u>Context sentence</u>               |
|-----|---------------|---------------------------------------|
| 1.  | bill          | Congress is very frustrating          |
| 2.  | add           | Two times three equals six            |
| 3.  | west          | Chicago is north of St. Louis         |
| 4.  | cute          | Puppies sleep in piles                |
| 5.  | start         | Fast runners win races                |
| 6.  | ears          | Listen closely when I speak           |
| 7.  | tan           | Use an umbrella to give shade         |
| 8.  | nest          | Baby birds eat worms                  |
| 9.  | camp          | Start a fire and roast marshmallows   |
| 10. | king          | Royal blood is blue                   |
| 11. | out           | The batter has two strikes            |
| 12. | lie           | Please tell me the truth              |
| 13. | three         | She is one of the triplets            |
| 14. | oil           | Offshore drilling is risky            |
| 15. | is            | Yesterday he was, tomorrow he will be |
| 16. | though        | She wants to, but she shouldn't       |
| 17. | he            | She went to her side                  |
| 18. | smooth        | Iron these wrinkly pants              |
| 19. | farm          | Cows and pigs eat corn                |
| 20. | this          | Soon I'll work on that one            |
| 21. | done          | Raise your hand when finished         |
| 22. | use           | Most drugs impair judgment            |
| 23. | say           | I've told you this before             |
| 24. | wool          | The pasture was dotted with sheep     |
| 25. | are           | "s" is for snake                      |
| 26. | aim           | He hunts with bow and arrow           |
| 27. | when          | All boys grow up                      |
| 28. | book          | Be careful with good paper            |
| 29. | tie           | His suit had thin stripes             |
| 30. | do            | Always remember wedding vows          |
| 31. | hand          | A ring sparkled on her finger         |
| 32. | end           | They lived happily ever after         |
| 33. | shove         | No pushing in crowded halls           |
| 34. | have          | She is an avid collector              |
| 35. | owes          | Gambling debts are piling up          |
| 36. | jar           | Donate well-preserved food            |
| 37. | know          | School is a place for learning        |
| 38. | may           | August and September are booked up    |
| 39. | knit          | The sweater started to unravel        |
| 40. | on            | Turn those bright lights off          |

41. if            Maybe I will be there
42. raw         Meat is unsafe until cooked
43. glove       My hand is very cold
44. ten          She is sixteen or seventeen
45. dull         Boring plays feel long
46. we          You and I are friends
47. chair        Sit down and watch the game
48. pie         He made them Thanksgiving dinner
49. ate         The chocolate cake is gone
50. year        Seniors started school as freshmen
